1                   **Self-applied carrageenan-based gel to prevent human papillomavirus infection**  
2                   **in sexually active young women: Final analysis of efficacy and safety of a randomised**  
3                   **controlled trial**

4  
5   Cassandra Laurie, Mariam El-Zein, Sarah Botting-Provost, Joseph E. Tota, Pierre-Paul Tellier,  
6   François Coutlée, Ann N. Burchell, Eduardo L. Franco

7  
8   **Division of Cancer Epidemiology, McGill University, Montreal, Canada** (C Laurie MSc; M  
9   El-Zein PhD; S Botting-Provost MSc; Prof E L Franco DrPH);

10 **Epidemiology Department, Merck & Co. Inc., Rahway, NJ, USA** (J E Tota PhD);

11 **Department of Family Medicine, McGill University, Montreal, Canada** (P-P Tellier MD);

12 **Laboratoire de virologie moléculaire, Centre de recherche, Centre hospitalier de l'Université**  
13 **de Montréal (CRCHUM), et Département de Microbiologie, infectiologie et Immunologie,**  
14 **Université de Montréal, Montréal, Canada** (F Coutlée MD);

15 **and Department of Family and Community Medicine and MAP Centre for Urban Health**  
16 **Solutions, Li Ka Shing Knowledge Institute, St. Michael's Hospital, Unity Health Toronto,**  
17 **Toronto, Canada** (A N Burchell PhD)

18  
19 Correspondence to:

20 Prof. Eduardo L Franco, Department of Oncology, McGill University, Montreal H4A 3T2, Canada  
21 **eduardo.franco@mcgill.ca**

22  
23 Abstract: 301 (300 max)

24 Manuscript: 425 excluding research in context section (3000-4500 max)

25 Tables and figures: 4 tables and 2 figures (not specified)

26 References: 29 (30 max)

## ABSTRACT

27  
28  
29  
30  
31  
32  
33  
34  
35  
36  
37  
38  
39  
40  
41  
42  
43  
44  
45  
46  
47  
48  
49  
50  
51  
52  
53  
54  
55  
56  
57

### Introduction

The Carrageenan-gel Against Transmission of Cervical Human papillomavirus trial’s interim analysis (June 2017, n=277) demonstrated a 36% protective effect of carrageenan against incident human papillomavirus (HPV) infections. We report the trial’s final results on efficacy and safety of a carrageenan-based gel in reducing HPV incidence and prevalence.

### Methods

A phase IIB randomised, placebo-controlled trial, recruited healthy young women aged  $\geq 18$  primarily from health service clinics at two Canadian Universities in Montreal, Canada. Participants were randomised (1:1) to a carrageenan-based or placebo gel to be self-applied every other day for the first month and before/after intercourse. Primary outcomes were HPV type-specific incidence and clearance of prevalent infections. At each visit (months 0, 0.5, 1, 3, 6, 9, 12), participants provided questionnaire data and a self-collected vaginal sample (tested for 36 HPV types, Linear Array). Intention-to-treat analyses were conducted using Cox proportional hazards regression models. Incidence and clearance analyses were restricted to participants with  $\geq 2$  visits. Trial registration: ISRCTN96104919.

### Findings

461 participants (enrolled January 16<sup>th</sup>/2013–September 30<sup>th</sup>/2020) were randomised to carrageenan (n=227) or placebo (n=234) arm. Incidence, clearance, and safety analyses included 429, 240, and 461 participants, respectively. We found 51.9% (108/208) of participants in carrageenan and 66.5% (147/221) in placebo arm acquired  $\geq 1$  HPV type (hazard ratio [HR] 0.63 [95% CI: 0.49-0.81]). Among participants who tested HPV-positive at baseline, clearance (two consecutive HPV-negative visits following  $\geq 1$  positive visit) was comparable between groups; 31.8% (34/107) in carrageenan and 29.3% (39/133) in placebo arm cleared their infections (HR 1.16 [95% CI: 0.73-1.84]). Adverse events were reported by 34.8% (79/227) and 39.7% (93/234) of participants in carrageenan and placebo arm ( $p < 0.27$ ), respectively.

58 **Interpretation**

59 Consistent with the interim analysis, use of a carrageenan-based gel resulted in a 37% reduction  
60 in the risk of incident genital HPV infections in women. A carrageenan-based gel may complement  
61 HPV vaccination.

62 **Funding**

63 Canadian Institute of Health Research (grants MOP-106610 and FDN-143347 to ELF),  
64 CarraShield Labs Inc. (St Petersburg, FL) [provided gels in kind].

65 **Keywords**

66 Carrageenan; Gel; HPV; Human papillomavirus; Microbicide; Randomized controlled trial.

## RESEARCH IN CONTEXT

### 67 Evidence before this study

68 We published in 2021 a narrative review summarizing carrageenan's preventive effect on human  
69 papillomavirus (HPV) based on results from 19 experimental research articles that reported on  
70 carrageenan's anti-HPV activity. Since publication and without applying language or date  
71 restriction, we identified four additional records based on a PubMed search using the keywords  
72 "carrageenan" and "human papillomavirus" or "HPV" up to January 9th, 2023.

73  
74 Altogether, these records consist of ten *in vitro* (including 4 *ex vivo*), five *in vitro* and *in vivo*, three  
75 *in vivo*, and five clinical studies (including one post-hoc phase III randomised controlled trial  
76 [RCT], one observational study, one interim analysis of a phase IIB RCT in women, and two  
77 records for the interim analyses of a phase IIB RCT in men). Studies assessed carrageenan alone  
78 or in combination with other anti-microbial agents. The results from pre-clinical studies were  
79 consistent with a protective effect of carrageenan against HPV.

80  
81 Overall, eight studies were conducted in humans. The samples collected were either 1)  
82 cervicovaginal lavage samples to assess anti-HPV activity *in vitro* (in three *ex vivo* studies, two  
83 being phase I RCTs), or 2) genital samples from women (post-hoc RCT [cervical], observational  
84 study [sample type not reported], and RCT phase II [vaginal]) or anal samples from men (one  
85 study of incidence and one of clearance). In the three *ex vivo* studies, intravaginal use of  
86 carrageenan-containing gels was associated with strong anti-HPV activity. In a post-hoc sub study  
87 of the trial, a lower HPV prevalence in the carrageenan compared to placebo arm was found at the  
88 trial end, but only among the most compliant users (adjusted odds ratio [aOR] 0.62 [95% CI 0.41-  
89 0.94], n=348). There were, however, no baseline or intermediate measurements to assess HPV  
90 status. An observational study reported that a carrageenan-based gel may accelerate clearance of  
91 existing HPV infection (aOR 4.9 [95% CI 1.60-15.1], n=75). The interim analysis of the CATCH  
92 study found a 36% protective effect of carrageenan against incident HPV infection(s) (HR 0.64  
93 [95% CI 0.45-0.89], n=277). Conversely, a clinical trial conducted in men who have sex with men  
94 did not demonstrate a protective effect of carrageenan on incidence (HR 1.21 [95% CI 0.86-1.70]),  
95 or clearance (HR 0.84 [95% CI 0.31-2.27]) of anal HPV infections, and reported more adverse  
96 events in the carrageenan (59.8%) relative to the placebo (39.8%) arm.

97 **Added value of this study**

98 The CATCH study is the first clinical trial designed to assess the efficacy of a carrageenan-based  
99 gel in reducing the risk of incident and prevalent HPV infections in women. Results were  
100 consistent when considering HPV subgenera and type-specific analyses. The addition of  
101 carrageenan to a lubricant gel does not appear to impact gel tolerability.

102

103 **Implications of all the available evidence**

104 The results of the CATCH trial indicate that carrageenan-based gels could complement HPV  
105 vaccination in protecting against HPV-related diseases. Our findings of the clinical efficacy of  
106 carrageenan may encourage future research in this area. It would be important to further examine  
107 adherence by looking at determinants of adherence, explore the possibility of the addition of  
108 carrageenan to condoms, assess the impact of a carrageenan-based gel on anal HPV infections in  
109 women, and continue research in the area of multi-purpose prevention technology for agents  
110 against HPV, HIV, and other sexually transmitted infections.

## INTRODUCTION

111  
112  
113  
114  
115  
116  
117  
118  
119  
120  
121  
122  
123  
124  
125  
126  
127  
128  
129  
130  
131  
132  
133  
134  
135  
136  
137  
138  
139  
140  
141

The most common sexually transmitted infection (STI) agent worldwide is human papillomavirus (HPV), which is a necessary cause of cervical cancer.<sup>1</sup> Globally, cervical cancer is the fourth most commonly diagnosed cancer in women, with an estimated 604,127 new cases and 341,831 deaths in 2020.<sup>2</sup> Elimination of cervical cancer is believed to be within our reach as per the World Health Organization's (WHO) 2020 call to eliminate cervical cancer through a three-pronged approach: 1) HPV vaccination of 90% of girls by age 15, 2) cervical cancer screening of 70% of women aged 35-45, and 3) treatment of 90% of women with cervical precancers and cancers.<sup>3</sup>

While HPV vaccination is a highly effective intervention for primary prevention of HPV, the development, implementation, and maintenance of HPV vaccination programs across different settings are not without their challenges, including the negative impact of the COVID-19 pandemic derailing the uptake of HPV vaccines, temporary HPV vaccine shortage, cold chain requirements, and vaccine hesitancy.<sup>4</sup> Although the global HPV vaccine supply is estimated to meet global demand,<sup>5</sup> the HPV vaccine shortage highlights the need for the development of complementary primary prevention methods. The use of a personal self-administered gel may support the WHO's goals to eliminate cervical cancer.

Carrageenan, an anionic polymer derived from red algae, previously showed promise as a potent anti-HPV inhibitor *in vitro* and *in vivo*,<sup>6</sup> and has a good safety profile for vaginal use.<sup>7</sup> The Carrageenan-gel Against Transmission of Cervical Human papillomavirus (CATCH) trial was specifically designed to evaluate the efficacy of a carrageenan-based gel against incident and prevalent HPV infections.<sup>8</sup> Based on the interim analysis (June 2017, N=277), carrageenan-gel use was associated with a 36% protective effect against incident human papillomavirus (HPV) infections compared to placebo gel use.<sup>9</sup> Anti-microbial agents, such as carrageenan, represent a promising area of research in STI prevention. We now report the results of the final analysis of efficacy and safety of a carrageenan-based gel in reducing HPV incidence and prevalence of genital HPV among sexually-active young women.

142  
143  
144  
145  
146  
147  
148  
149  
150  
151  
152  
153  
154  
155  
156  
157  
158  
159  
160  
161  
162  
163  
164  
165  
166  
167  
168  
169  
170  
171  
172

## METHODS

The trial findings are reported following the CONSORT (Consolidated Standards of Reporting Trials) 2010 checklist.<sup>10</sup>

### Study design and population

The CATCH trial is an exploratory phase IIB block-randomised, placebo-controlled trial. The full details of the study protocol and data collection were previously described.<sup>13</sup> We recruited female university students through McGill Health Service Clinic, Concordia Health Services, the Centre intégré de santé et de services sociaux de la Montérégie-Centre-Territoire Champlain-Charles-Le Moyne, and (as of September 2018) at the Gerald Bronfman Department of Oncology at the Division of Cancer Epidemiology of McGill University, Québec, Canada. Enrollment and follow-up visits were conducted at months 0.5, 1, 3, 6, 9, and 12. Study data were securely stored by LFC hosting until December 15, 2019. Thereafter, data were collected and stored using REDCap (Research Electronic Data Capture) tools.<sup>11,12</sup> The study received ethical approval from McGill University, Centre Hospitalier de l'Université de Montréal, Concordia University, and the Centre intégré de santé et de services sociaux de la Montérégie-Centre-Territoire Champlain-Charles-Le Moyne. Participants gave written informed consent (and e-consent as of September 5, 2019), which was administered by the study nurse.

### Eligibility

Eligible women to participate were those aged 18 years and older, living in Montreal and planning to remain in Montreal for at least the next year, who had vaginal sex with a male partner during the past 3 months and expect do so again in the next 3 months (regardless of whether or not the male partner(s) will change), not currently in a relationship that has lasted longer than 6 months (i.e. likely to be exposed to new HPV infections), willing to follow study instructions and attend follow-up visits for 12 months, who understand French or English, and who use a medically acceptable method of contraception and intend to use it for the duration of the trial. Women were considered ineligible based on the following exclusion criteria: have had a hysterectomy, have a history of cervical lesions/cancer or genital warts, pregnant or planning to immediately become pregnant, currently breast-feeding, had a recent (within the last 6 weeks) pregnancy, abortion, or genital surgery, have human immunodeficiency virus (HIV) infection, have a known allergy or

173 hypersensitivity to vaginal lubricants and have allergy to any of the ingredients of the study product  
174 or placebo, have participated in any research studies (past 3 months) related to HPV or cervical  
175 cancer, or have participated in any research studies (past 3 months) that require taking medications  
176 or supplements, undergo medical tests or procedures, or undertake dietary or exercise regimens.

177

### 178 **Randomisation and masking**

179 Participants were randomised (1:1) to a carrageenan-based or placebo gel by the study nurse, using  
180 computer-assisted block randomisation with a block-size of 8. The intervention and placebo gels  
181 were packaged in identical containers, except for the product code label; four different codes were  
182 used for the intervention gel and an additional four for the control. The participant, study nurses,  
183 and laboratory technicians were blinded to group assignment.

184

### 185 **Procedures and data/samples collection**

186 Participants were instructed to apply the study gel every other day for the first month as well as  
187 before (and after as of October 26, 2015) each vaginal intercourse. Approximately 5-10mL of the  
188 gel was to be applied to the vagina, penis, and/or condom. STI protection methods (e.g., condoms)  
189 were encouraged. Participants were asked to refrain from intercourse at least 48 hours prior to their  
190 follow-up visits. Both study gels are commercially available (Divine9 and Divine), made by  
191 CarraShield Labs Inc. (St Petersburg, FL). The study gels are identical; both are water-based, clear,  
192 odourless, tasteless, and of a similar viscosity. The distinguishing feature is the inclusion of  
193 carrageenan in the intervention gel.

194

195 At enrollment and each follow-up visit, participants completed a computer-assisted questionnaire  
196 on sociodemographic characteristics, smoking and alcohol use, medical and sexual history (only  
197 at enrollment), sexual activity and study gel use since last visit (only at follow-up), and condom  
198 and lubricant use (both enrollment and follow-up). In addition, a daily online calendar included  
199 questions on sexual behaviour, gel use, and adverse events (AEs). Participants could enter and  
200 modify calendar information for the seven previous days, which required them to log in at least  
201 once a week with a username and password. Additional details are provided in Supplementary  
202 Section 1: Figure 1 and Tables 1A-1C.

203



204 A self-collected vaginal sample was obtained at each study visit. Samples were tested using Linear  
205 Array (Roche Molecular Diagnostics, Branchburg, NJ) for detection and genotyping of 36 HPV  
206 types.<sup>13</sup> Samples were tested for beta-globin prior to genotyping. Of 2510 samples, 19 were  
207 unavailable (12 samples were beta-globin negative and 7 were mishandled). Carrageenan as used  
208 in the clinical protocol above was not shown to inhibit HPV detection in genital samples.<sup>14</sup>

209

## 210 **Outcomes**

211 The two primary outcomes were 1) presence of a newly detected vaginal HPV infection that was  
212 not detected at enrollment, and 2) HPV type-specific clearance of infection(s) detected at  
213 enrollment. The secondary outcome was adherence (i.e., compliance) to the intervention measured  
214 using data from the daily online calendar. Adherent participants were defined as those who used  
215 the gel as recommended in >50% of all intercourse acts. While not pre-specified, we also assessed  
216 1) adherence to gel use defined as cumulative adherence prior to censoring or failure, and 2) safety  
217 of the study gels by compiling all adverse events that were reported.

218

## 219 **Statistical analysis**

220 Details on sample size calculation in the CATCH protocol showed that the required sample size  
221 was 463 for incidence and 388 for clearance analyses.<sup>8</sup> Based on oncogenic risk and tissue tropism,  
222 we grouped HPV types into subgenera; low-risk types in subgenus 1: HPVs 6, 11, 40, 42, 44, and  
223 54; high-risk types in subgenus 2: HPVs 16, 18, 26, 31, 33, 34, 35, 39, 45, 51, 52, 53, 56, 58, 59,  
224 66, 67, 68, 69, 70, 73, and 82; and commensal HPVs in subgenus 3: HPVs 61, 62, 71, 72, 81, 83,  
225 84, and 89.<sup>15-17</sup> Baseline visits with missing HPV data (n=3) were imputed based on data at the  
226 second visit (on average, 14 days after the first visit).

227

228 Adherence to the intervention was defined as the number of gel uses divided by the number of  
229 vaginal intercourses in the seven days prior to the study visit (from follow-up survey data) and  
230 between consecutive study visits (from calendar data). We compared adherence between groups  
231 and study visits. Due to (non-significant) imbalances in baseline HPV vaccination status between  
232 arms and discrepancies in reporting of vaccination status between screening (pre-enrollment) and  
233 the baseline survey (at enrollment), we validated participants' vaccination status by either  
234 confirming their status via email or (in the case of no email reply) by using the date of vaccination

235 reported in their baseline or follow-up survey (Supplementary Section 2: Figure 2 and Tables 2A-  
236 2C).

237  
238 Cox proportional hazards regression models were used to evaluate the efficacy of carrageenan in  
239 reducing vaginal HPV incidence/detection and prevalence. Missing HPV data for follow-up visits  
240 were censored in incidence and clearance analyses. Incidence analyses, performed by any HPV  
241 positivity (if a participant was positive for one or more HPV types at baseline, they remain at risk  
242 of acquiring HPV types absent at baseline) and subgenera (separate analyses done for each of the  
243 three subgenera), included participants who had at least 1 follow-up visit. We performed sub-group  
244 analyses to compare the intervention effects according to main baseline characteristics and  
245 cumulative adherence to gel use prior to failure (new detection of an HPV type) or censoring.

246  
247 Participants were included in clearance analyses if they had at least two study visits and were HPV-  
248 positive at baseline. We considered two definitions of clearance: liberal (one HPV-negative visit  
249 following at least one HPV-positive visit) and conservative (two consecutive HPV-negative visits  
250 following at least one HPV-positive visit). We considered time to 1) clearance of all baseline HPV  
251 infections and 2) first clearance of any baseline HPV infection.

252  
253 Analyses were also done at the HPV-level, where the unit of analysis was each individual HPV  
254 type. The models were stratified by HPV type and clustered by participant. For incidence analyses,  
255 participants were considered at risk for any HPV type absent at baseline, where each participant  
256 could contribute up to 36 observations, each corresponding to an HPV type. For HPV-level  
257 clearance analyses, participants were considered at risk for clearing any of their baseline HPV  
258 infections.

259  
260 To assess safety of the study gels, we tabulated self-reported AEs and/or reactions that were  
261 recorded by means of the 1) *daily calendar*, 2) *follow-up survey* administered at each follow-up  
262 visit, 3) *adverse event module (nurse report)* during follow-up visits, and/or 4) reporting of an  
263 adverse event during *adverse event follow-up*. AEs reported in the daily calendar were graded  
264 (mild, moderate, or severe) by participants.

265

266 Data management and analyses were done in SAS V9.4 and Stata version 17, respectively. The  
267 trial was registered (ISRCTN96104919) and approved by Health Canada (authorization file  
268 number 169160). A data safety and monitoring board reviewed and recommended publication of  
269 the previously published interim analysis,<sup>9</sup> as well as the final trial results reported herein.

270

### 271 **Role of funding source**

272 The funders of the study had no role in study design, data collection, data analysis, data  
273 interpretation, or writing of the report.

274

275

## **RESULTS**

276 Recruitment took place between January 16th, 2013 and October 30th, 2020. As shown in Figure  
277 1, 1016 participants were assessed for eligibility. Of these, 461 were randomised into the  
278 carrageenan (n=227) and placebo (n=234) arms. Study visits 2-7 were completed by 461, 429, 399,  
279 362, 318, 291, and 257 participants, respectively. Overall, 429, 240, and 461 participants were  
280 included in the incidence, clearance, and safety analyses, respectively. Supplementary Figure 3  
281 shows the distribution of time between baseline and subsequent visits compared to the study  
282 schedule. While there were variations between the actual and planned study schedule, little  
283 difference was observed between intervention arms.

284 Baseline characteristics of study participants are shown in Table 1. The median age was 23.0 in  
285 the carrageenan and 21.9 in the placebo arm. Most participants were Canadian, single, never  
286 smokers, had less than 5 lifetime sexual partners, and had 1 sexual partner in the past month. The  
287 median age at first intercourse was 17. More participants in placebo (60.3%) compared to  
288 carrageenan (50.7%) arm were infected with any HPV type at baseline, which was consistent by  
289 subgenera. Detailed HPV prevalence data at each study visit are shown for carrageenan and  
290 placebo arms in Supplementary Tables 3A and B, respectively. Fewer participants in the  
291 carrageenan (26.1%) compared to placebo arm (31.7%) reported ever having anal intercourse  
292 during follow-up. Fewer participants in carrageenan (42.7%) compared to placebo (51.3%) arm  
293 reported being vaccinated against HPV. The difference in vaccination status between arms was  
294 smaller based on validated vaccination status; 42.3% of participants in carrageenan and 49.2% in  
295 placebo arm reported receiving the HPV vaccine.

296 Follow-up characteristics of the participants are shown in Supplementary Table 4. The median  
297 overall follow-up time was 12.2 months. At the observation level (observations between two  
298 consecutive study visits), adherence was comparable between arms; 26.0% of participants in  
299 carrageenan and 26.9% in placebo arm reported >75% adherence in the 7 days preceding each  
300 visit based on data from the follow-up surveys.

301 As shown in Table 2, fewer participants in carrageenan (51.9%, 108/208) acquired an incident  
302 HPV infection compared to placebo (66.5%, 147/221) arm (HR 0.63, 95% CI 0.49-0.81). This  
303 effect was consistently observed in participant-level analyses by subgenera (HRs ranged from  
304 0.58-0.70) and in the HPV-level analysis (HR 0.65, 95% CI 0.50-0.83). Figure 2 shows the  
305 cumulative incidence of HPV by intervention arm; participant- (Fig2A) and HPV- (Fig2B) level  
306 results were consistent with a protective effect of carrageenan against incident HPV infections.

307 Table 3 shows time to clearance of all HPV types and time to clearance of the first cleared HPV  
308 infection by clearance definition (liberal and conservative). The effect estimates were consistently  
309 greater than the null value but never reached statistical significance, irrespective of the analysis  
310 level, clearance outcome, or clearance definition. Based on liberal clearance definition of all HPV  
311 types, 57.9% (62/107) of participants cleared all their baseline infections in carrageenan and  
312 49.6% (66/133) in placebo arm, corresponding to a HR of 1.41 (95% CI 0.99-2.00). By applying  
313 the conservative definition, the HR was 1.16 (95% CI 0.73-1.84). When considering only the first  
314 cleared infection, 79.4% (85/107) cleared at least 1 HPV infection in the carrageenan and 79.0%  
315 (105/133) in the placebo arm (HR 1.03, 95% CI 0.77-1.38) for the liberal definition; these values  
316 were 62.6% (67/107) and 60.9% (81/133) (HR 1.04, 95% CI 0.75-1.44) for conservative  
317 clearance, respectively. No remarkable differences were observed when considering time to  
318 clearance of individual HPV types; 66.8% cleared at least 1 HPV type in the carrageenan and  
319 65.7% in the placebo arm (HR 1.17, 95% CI 0.90-1.51) for the liberal definition, and 45.0%  
320 cleared at least 1 HPV type in the carrageenan and 45.7% in the placebo arm (HR 1.10, 95% CI  
321 0.84-1.43) for the conservative definition.

322 Overall, there was a similar proportion of AEs reported in each arm: 34.8% (79/227) in the  
323 carrageenan and 39.7% in the placebo arm (93/234) (Table 4). Those most frequently reported  
324 were vaginal yeast infection, itching, burning or pain in the genital area, and bacterial vaginosis.

325 Of participants who reported an AE in the daily calendar, 24·3% (9/37) in carrageenan and 30·8%  
326 (12/39) in placebo arm graded their AEs as severe (Supplementary Table 5); the most common  
327 severe AE was “itching, burning or pain in the genital area”. We did not observe a higher  
328 proportion of withdrawals among participants who reported adverse events nor among participants  
329 who reported difficulties using the study gel (Supplementary Table 6). The proportion of  
330 participants reporting difficulties with the study gel before, during, or after intercourse was similar  
331 between arms (77·2% [159/204] in the carrageenan and 80·7% [176/218] in the placebo arm); the  
332 most frequently reported difficulties were not having the CATCH gel at the time of intercourse or  
333 forgetting to use the CATCH gel (Supplementary Table 7).

334 No differences were observed in sub-group analyses by baseline characteristics (age, ethnicity,  
335 marital status, smoking status, age at first intercourse, lifetime sexual partners, sex partners in the  
336 last month, HPV status at baseline, and vaccination status) and cumulative adherence to gel use  
337 (Supplementary Figure 4). There was also no evidence of a dose-response relationship based on  
338 cumulative adherence to gel use prior to failure or censoring, irrespective of data used (calendar  
339 data or follow-up survey data) nor categorization (binary [ $<50$ ,  $\geq 50$ ] or categorical), nor was a  
340 more protective effect observed when analyses were restricted to participants with an overall  
341 adherence  $>50\%$  (per-protocol analysis) [Supplementary Table 8].

342  
343

## DISCUSSION

344

345 We found a 37% protective effect of carrageenan-gel use against incident HPV infections  
346 compared to placebo gel use, but no acceleration of clearance of existing HPV infections.  
347 Adherence was balanced between arms, and the study gels were generally well tolerated. These  
348 findings corroborate the interim analysis results, published in 2019, which reported a nearly  
349 identical estimate of a 36% protective effect of carrageenan against incident HPV infection (HR  
350 0·64 [95% CI 0·45-0·89], N=277).<sup>9</sup>

351

352 Clinical studies, and trials in particular, on the efficacy of carrageenan-based gels against HPV  
353 infection are scarce (Supplementary Table 9). The CATCH study represents the first phase IIB  
354 trial specifically designed to assess the efficacy of carrageenan against incident and prevalent HPV  
355 infections. Prior to its initiation, a post-hoc analysis of a trial originally designed to assess

356 carrageenan's anti-HIV effect found a lower prevalence of HPV at the trial's end in compliant  
357 users of Carraguard® (carrageenan gel) compared to compliant placebo (methylcellulose) gel  
358 users (aOR 0.62 [95% CI 0.41-0.94], N=348) adjusted for site, STI, average coital frequency,  
359 longer time in study, abnormal pap smear, baseline condom use, age by relationship, and  
360 promiscuity by condom use; however, this was a subgroup analysis, and there were no baseline  
361 nor intermediate measures of HPV to use as a reference.<sup>18</sup> Other smaller trials, evaluated  
362 carrageenan's anti-HPV activity *in vitro* from a cervicovaginal lavage using combination products  
363 of MIV-150, zinc acetate dihydrate, and carrageenan (20 participants),<sup>19</sup> as well as carrageenan  
364 and griffithsin (13 participants),<sup>20</sup> demonstrating anti-HPV activity in all or the majority of  
365 samples. Moreover, while there was evidence for carrageenan preventing vaginal HPV infections,  
366 carrageenan-based gels have not been shown to be effective against anal HPV infections in men,<sup>21</sup>  
367 possibly due in part to anatomical differences between the vagina and anal canal, as well as  
368 histological differences: stratified squamous in the vagina and simple columnar and stratified  
369 squamous epithelium in the anal canal.

370  
371 Adherence to the intervention was balanced by arm. We would expect to see that more compliant  
372 participants would have increased protection against incident HPV infections. Another trial,  
373 assessing Carraguard®'s anti-HPV activity post-hoc, found a protective effect of carrageenan  
374 against prevalent HPV infections but only among adherent users (20.3%, 348/1718).<sup>18</sup> However,  
375 in the CATCH trial, a dose-response relationship was not observed. This could be due to  
376 misclassification of adherence. For example, during the first month of participation, participants  
377 were asked to apply the gel every other day for the purpose of assessing if the gel could increase  
378 clearance of existing infections. If a participant reported vaginal intercourse but no gel use during  
379 vaginal intercourse, but used the gel outside of vaginal intercourse, she would be classified as non-  
380 compliant but may have been offered some protection against HPV infection due to residual  
381 carrageenan gel in the vaginal canal. One study showed that carrageenan is present 8-24 hours  
382 after Carraguard® gel application for the majority of participants (75%, 12/16), based on  
383 cervicovaginal lavage samples.<sup>22</sup> In a study that tested Divine9™, carrageenan was detected in  
384 mouse vaginal washes up to 4 hours after application, but not after 24 hours.<sup>23</sup> Another study  
385 testing Divine9, but in cervicovaginal lavage samples, detected carrageenan in the majority (78%)  
386 of samples 8 hours after gel application.<sup>24</sup> Based on these studies, it is reasonable to expect that

387 there would at least be some anti-HPV activity several hours post-application, suggesting that if a  
388 woman applied the gel in the morning and had intercourse in the evening that she could have been  
389 offered some protection.

390  
391 The assessment of gel safety, comparing Divine9 (intervention) to Divine (placebo), found 37%  
392 of participants reported AEs. A large trial (N=6202), comparing Carraguard® (a carrageenan-  
393 based gel) to methylcellulose with up to 2 years of follow-up, reported that 23% of participants  
394 experienced AEs.<sup>7</sup> This indicates worse tolerability of the study gels used in the CATCH trial  
395 compared to the Carraguard® trial. Over the course of follow-up, 16.5% of CATCH participants  
396 reported a vaginal yeast infection and 5.6% reported having bacterial vaginosis. These proportions  
397 are lower than those reported in a phase II safety trial (N=165), comparing Carraguard® to  
398 methylcellulose, where 38% of participants reported having a yeast infection and 22% reported  
399 having bacterial vaginosis over follow-up.<sup>25</sup> The difference may be explained by the nature of  
400 reporting; these conditions were self-reported in the CATCH study, whereas they were  
401 systematically tested for at each study visit in the safety trial.<sup>25</sup> The nature of reporting may have  
402 led to detection bias (i.e., systematically testing for these conditions leading to more detections),  
403 as bacterial vaginosis can be asymptomatic and therefore not self-reported by participants.

404  
405 While the study gels were approved by Health Canada and have received 510(k) clearance by the  
406 United States Food and Drug Administration (FDA), they are hyperosmolal and therefore do not  
407 meet the current WHO recommendation for osmolality (<1200mOsM/kg).<sup>26</sup> Hyperosmolality and  
408 certain ingredients, such as polyquaternium-15 and nonoxynol-9, have been shown to increase  
409 epithelial exfoliation, or sloughing, and cause cytotoxicity, potentially increasing the risk of  
410 acquiring certain STIs.<sup>26</sup> However, these products remain commercially available. Studying the  
411 tolerability of lubricants and identifying the ingredients responsible for causing irritation is a  
412 challenge, as conclusive evidence on the safety and harms associated with personal lubricant is  
413 difficult to generate due to a high number of potential confounders, such as condom use, frequency  
414 of sex, and differences in reporting of lubricant use. For example, a lack of evidence of harm  
415 caused by polyquaternium led the WHO in 2020 to revert its 2012 recommendation to avoid  
416 polyquaternium in personal lubricants.<sup>26</sup> The study gels were later reformulated using the same  
417 type of carrageenan at the same concentration but with adjustments to inactive ingredients to meet

418 the WHO recommendations on osmolality. The reformulated gel was not used in the CATCH trial  
419 (Dean Fresonke, Personal communication).

420  
421 The trial was not without limitations. First, gel use was self-reported, which may be subject to  
422 social desirability bias if participants tended to overreport adherence to gel use. This could  
423 possibly lead to misclassification of exposure and would be expected to bias the estimate towards  
424 the null in adherence analyses. Second, the proportion of AEs experienced by participants in the  
425 carrageenan arm might have been underestimated. Comparing participants in carrageenan to  
426 placebo arm, there were fewer participants randomised (227 versus 234), more participants who  
427 discontinued participation after their first visit (19/227 versus 13/234), and fewer participants who  
428 reported AEs (19/227 versus 9/234), leading to fewer participants available to report AEs in the  
429 carrageenan arm. Thirdly, the placebo gel, while identical to the intervention gel except for the  
430 addition of carrageenan, may not be a true placebo, as it could have anti-HPV activity that would  
431 bias the estimate towards the null. While AEs were balanced between arms, this does not exclude  
432 the possibility that the study gels could have caused more irritation than would be expected from  
433 other common lubricants or methylcellulose, which has been used in other microbicide trials. The  
434 greatest strength of the trial is that it is the first phase IIB randomized controlled trial designed to  
435 assess the efficacy of a carrageenan-based gel on incident and prevalent HPV infections. A strength  
436 of having two identical gels, with the exception of the addition of carrageenan, is that the protective  
437 effect observed can be attributed to the presence of carrageenan. An additional strength is the  
438 collection of detailed information over time, in particular the implementation of a daily calendar  
439 to obtain details of gel use, sexual activity, and adverse events, which lead to the collection of  
440 95,327 observations. HPV positivity was assessed by detecting 36 different HPV types using the  
441 Linear Array, which allowed us to assess genotype-specific HPV incidence among HPV-positive  
442 women.

443  
444 It has been hypothesized that carrageenan works by binding directly to the HPV capsid, thereby  
445 preventing HPV from binding to heparan sulfate proteoglycan (HSPG), which is a key step in the  
446 infection process on the basement membrane.<sup>27</sup> Carrageenan has also been shown to prevent  
447 attachment of HPV to human sperm,<sup>28</sup> potentially preventing dispersion of HPV within the vaginal



448 canal. Carrageenan may also act through a secondary mechanism independent of HSPG, where  
449 carrageenan prevents the virus from binding secondary receptors during the infection process.<sup>28,29</sup>  
450 Multiple mechanisms may be responsible for the anti-HPV activity demonstrated in the CATCH  
451 study.

452  
453 This research supports current investigations on the use and utility of carrageenan co-formulated  
454 with other anti-microbials (such as griffithsin and carrageenan) in multi-prevention technologies,<sup>20</sup>  
455 as well as with MIV-150, consisting of an anti-HIV agent, zinc acetate and carrageenan.<sup>19</sup> To  
456 improve adherence to the intervention and encourage STI protection in general, it may be equally  
457 important to also study use of carrageenan-based gels in pre-packaged condoms.

458  
459 Despite the high osmolality of the study gels, carrageenan was protective against incident HPV  
460 infections in women. Given that carrageenan-based gels have not demonstrated efficacy in  
461 preventing anal HPV infections in men, it would be necessary to conduct a gel tolerability study  
462 with the reformulated carrageenan-based gel at the correct osmolality in both women and men that  
463 include measurements of anal HPV.

464  
465 In conclusion, carrageenan compared to placebo gel use was associated with a reduction in incident  
466 HPV infections. Topical microbicides against HPV, such as carrageenan-based gels, may have  
467 utility as a complement to HPV vaccination among sexually active women.

#### 468 469 **Contributors**

470 The authors contributed to: conceptualisation (ELF, ANB, FC, P-PT, JET, CL, MZ); data curation  
471 (MZ, CL, SBP); formal analysis (CL); funding acquisition (ELF, ANB, FC, P-PT, JET);  
472 investigation (ELF, MZ, CL, SBP, FC), methodology (ELF, ANB, FC, P-PT, JET, MZ, CL);  
473 project administration (ELF, MZ); resources (ELF, MZ, FC); supervision (ELF, MZ); validation  
474 (CL, SBP); visualisation (CL); writing – original draft (CL); and writing – reviewing and editing  
475 (ELF, ANB, FC, P-PT, JET, MZ, SBP, CL). CL and SBP directly assessed and verified the  
476 underlying data. All authors had full access to the study data and had the final responsibility to  
477 decide to submit for publication.

478

479 **Declaration of interests**

480 ELF reports grants and personal fees from Merck, grants, personal fees and non-financial support  
481 from Roche, and personal fees from GSK, outside the submitted work. ELF and MZ hold a patent  
482 related to the discovery “DNA methylation markers for early detection of cervical cancer”,  
483 registered at the Office of Innovation and Partnerships, McGill University, Montreal, Quebec,  
484 Canada (October 2018). FC reports grants from Réseau FRQS-SIDA during the conduct of the  
485 study and grants to his institution for HPV-related work from Merck Sharp and Dome, Roche  
486 Diagnostics and Becton Dickinson, outside of the submitted work. JET is an employee of Merck  
487 Sharp & Dohme LLC, a subsidiary of Merck & Co., Inc, Rahway, NJ, USA. P-PT, ANB, SBP,  
488 and CL have nothing relevant to this article to declare.

489

490 **Data sharing**

491 The sample code used to generate the results are available in the McGill Dataverse repository  
492 (<https://doi.org/10.5683/SP3/0DS6FP>). Following publication, the anonymized study data and a  
493 codebook will be made also available. The study protocol and accompanying documents, such as  
494 the informed consent form were previously published.<sup>8</sup>

495

496 **Acknowledgements**

497 The study was funded by the Canadian Institutes of Health Research (grant number MOP-106610  
498 and grant FDN-143347 to ELF). CarraShield Labs Inc. (St Petersburg, FL) provided the gels in-  
499 kind. CarraShield Labs Inc was not involved in the design of the study, data collection, analyses,  
500 and interpretation of trial results. ANB is a Canada Research Chair in Sexually Transmitted  
501 Infection Prevention; she also receives salary support from a Non-Clinician Scientist Award,  
502 Department of Family and Community Medicine, Faculty of Medicine, University of Toronto.

503

504 We wish to thank study participants, employees of the CATCH study, and laboratory research  
505 assistants. We also acknowledge the members of the Data Safety and Monitoring Board who  
506 evaluated the safety and efficacy of the CATCH study at the interim and final analysis stages.

## 507 REFERENCES

- 508 1. de Sanjosé S, Diaz M, Castellsagué X, et al. Worldwide prevalence and genotype  
509 distribution of cervical human papillomavirus DNA in women with normal cytology: a meta-  
510 analysis. *Lancet Infect Dis* 2007; **7**: 453–9.
- 511 2. Sung H, Ferlay J, Siegel RL, et al. Global Cancer Statistics 2020: GLOBOCAN  
512 Estimates of Incidence and Mortality Worldwide for 36 Cancers in 185 Countries. *CA Cancer J*  
513 *Clin* 2021; **71**(3): 209–49.
- 514 3. WHO. A cervical cancer-free future: First-ever global commitment to eliminate a cancer.  
515 2020. <https://www.who.int/news/item/17-11-2020-a-cervical-cancer-free-future-first-ever-global-commitment-to-eliminate-a-cancer#:~:text=eliminate%20a%20cancer-,A%20cervical%20cancer%2Dfree%20future%3A%20First%2Dever%20global,commitment%20to%20eliminate%20a%20cancer&text=WHO's%20Global%20Strategy%20to,%3A%20vaccination%2C%20screening%20and%20treatment>. (accessed December 26, 2022).
- 516  
517  
518  
519
- 520 4. Toh ZQ, Russell FM, Garland SM, Mulholland EK, Patton G, Licciardi PV. Human  
521 Papillomavirus Vaccination after COVID-19. *JNCI Cancer Spectr* 2021; **5**.
- 522 5. WHO. Global Market Study HPV (Working Document) March 2022. 2022.  
523 [https://cdn.who.int/media/docs/default-source/immunization/mi4a/who-mi4a-global-market-](https://cdn.who.int/media/docs/default-source/immunization/mi4a/who-mi4a-global-market-study-hpv.pdf?sfvrsn=649561b3_1&download=true)  
524 [study-hpv.pdf?sfvrsn=649561b3\\_1&download=true](https://cdn.who.int/media/docs/default-source/immunization/mi4a/who-mi4a-global-market-study-hpv.pdf?sfvrsn=649561b3_1&download=true) (accessed December 26, 2022).
- 525 6. Laurie C, El-Zein M, Coultée F, de Pokomandy A, Franco EL. Carrageenan as a  
526 preventive agent against human papillomavirus infection. *Sex Transm Dis* 2021; **48**: 458–65.
- 527 7. Skoler-Karppoff S, Ramjee G, Ahmed K, et al. Efficacy of Carraguard for prevention of  
528 HIV infection in women in South Africa: a randomised, double-blind, placebo-controlled trial.  
529 *Lancet* 2008; **372**: 1977–87.
- 530 8. Laurie C, Tota JE, El-Zein M, et al. Design and methods for the Carrageenan-gel Against  
531 Transmission of Cervical Human papillomavirus (CATCH) study: A randomized controlled trial.  
532 *Contemp Clin Trials* 2021; **110**: 106560.
- 533 9. Magnan S, Tota JE, El-Zein M, et al. Efficacy of a Carrageenan gel Against Transmission  
534 of Cervical HPV (CATCH): interim analysis of a randomized, double-blind, placebo-controlled,  
535 phase 2B trial. *Clinic Microbiol Infect* 2019; **25**: 210–6.
- 536 10. Schulz KF, Altman DG, Moher D, Group C. CONSORT 2010 Statement: Updated  
537 Guidelines for Reporting Parallel Group Randomized Trials. *Ann Intern Med* 2010; **152**(11):  
538 726–32.
- 539 11. Harris PA, Taylor R, Thielke R, Payne J, Gonzalez N, Conde JG. Research electronic  
540 data capture (REDCap)—A metadata-driven methodology and workflow process for providing  
541 translational research informatics support. *J Biomed Inform* 2009; **42**: 377–81.
- 542 12. Harris PA, Taylor R, Minor BL, et al. The REDCap consortium: Building an  
543 international community of software platform partners. *J Biomed Inform* 2019; **95**: 103208.
- 544 13. Coultée F, Rouleau D, Petignat P, et al. Enhanced detection and typing of human  
545 papillomavirus (HPV) DNA in anogenital samples with PGMY primers and the linear array HPV  
546 genotyping test. *J Clin Microbiol* 2006; **44**: 1998–2006.
- 547 14. Laurie C, El-Zein M, Franco EL, Coultée F. Assessment of the possible inhibitory effect  
548 of carrageenan in human papillomavirus DNA testing by polymerase chain reaction  
549 amplification. *J Med Virol* 2021; **93**: 6408–11.
- 550 15. Shaw E, Ramanakumar AV, El-Zein M, et al. Reproductive and genital health and risk of  
551 cervical human papillomavirus infection: Results from the Ludwig-McGill cohort study. *BMC*  
552 *Infect Dis* 2016; **16**: 116.

- 553 16. Schiffman M, Clifford G, Buonaguro FM. Classification of weakly carcinogenic human  
554 papillomavirus types: addressing the limits of epidemiology at the borderline. *Infect Agent*  
555 *Cancer* 2009; **4**: 8.
- 556 17. Schiffman M, Herrero R, DeSalle R, et al. The carcinogenicity of human papillomavirus  
557 types reflects viral evolution. *Virology* 2005; **337**: 76–84.
- 558 18. Marais D, Gawarecki D, Allan B, et al. The effectiveness of Carraguard, a vaginal  
559 microbicide, in protecting women against high-risk human papillomavirus infection. *Antivir Ther*  
560 2011; **16**: 1219–26.
- 561 19. Friedland BA, Hoesley CJ, Plagianos M, et al. First-in-Human Trial of MIV-150 and  
562 Zinc Acetate Coformulated in a Carrageenan Gel. *J Acquir Immune Defic Syndr* 2016; **73**: 489–  
563 96.
- 564 20. Teleshova N, Keller MJ, Romero JAF, et al. Results of a phase 1, randomized,  
565 placebocontrolled first-in-human trial of griffithsin formulated in a carrageenan vaginal gel.  
566 *PLoS One* 2022; **17**: e0261775.
- 567 21. Laurie C, El-Zein M, Tota JE, et al. Efficacy of a carrageenan gel in preventing anal  
568 human papillomavirus (HPV) infection: interim analysis of the Lubricant Investigation in Men to  
569 Inhibit Transmission of HPV Infection (LIMIT-HPV) randomised controlled trial. *Sex Transm*  
570 *Infect* 2021; **98**: 239–46.
- 571 22. Haaland RE, Chaowanachan T, Evans-Strickfaden T, et al. Carrageenan-based gel retains  
572 limited anti-HIV-1 activity 8-24 hours after vaginal application by HIV-infected Thai women  
573 enrolled in a phase I safety trial. *J Acquir Immune Defic Syndr* 2012; **61**: e71–3.
- 574 23. Rodriguez A, Kleinbeck K, Mizenina O, et al. In vitro and in vivo evaluation of two  
575 carrageenan-based formulations to prevent HPV acquisition. *Antiviral Res* 2014; **108**: 88–93.
- 576 24. Novetsky AP, Keller MJ, Gradissimo A, et al. In vitro inhibition of human  
577 papillomavirus following use of a carrageenan-containing vaginal gel. *Gynecol Oncol* 2016; **143**:  
578 313–8.
- 579 25. Kilmarx PH, van de Wijgert JHHM, Chaikummao S, et al. Safety and Acceptability of  
580 the Candidate Microbicide Carraguard in Thai Women. *J Acquir Immune Defic Syndr* 2006; **43**:  
581 327–34.
- 582 26. Laurie C, Franco E. The potential harms of personal lubricants. *DST-J* 2020; **32**: 1–4.
- 583 27. Buck CB, Thompson CD, Roberts JN, et al. Carrageenan is a potent inhibitor of  
584 papillomavirus infection. *PLoS Pathog* 2006; **2**: e69.
- 585 28. Perez-Andino J, Buck CB, Ribbeck K, Pérez-Andino J, Buck CB, Ribbeck K. Adsorption  
586 of human papillomavirus 16 to live human sperm. *PLoS One* 2009; **4**: e5847.
- 587 29. Wang JW, Jagu S, Kwak K, et al. Preparation and properties of a papillomavirus  
588 infectious intermediate and its utility for neutralization studies. *Virology* 2014; **449**: 304–16.  
589

**Table 1. Baseline characteristics of participants, by study arm**

|                                                                 | <b>Carrageenan<br/>(n=227)</b> | <b>Placebo<br/>(n=234)</b> |
|-----------------------------------------------------------------|--------------------------------|----------------------------|
| <b>Age – years</b>                                              |                                |                            |
| Mean (SD)                                                       | 25.5 (7.4)                     | 23.4 (5.4)                 |
| Median (IQR)                                                    | 23.0 (7.4)                     | 21.9 (5.3)                 |
| Range                                                           | 18.3-68.5                      | 18.1-44.2                  |
| <b>Ethnicity, n (%)</b>                                         |                                |                            |
| French Canadian                                                 | 53 (23.4)                      | 47 (20.1)                  |
| English Canadian                                                | 62 (27.3)                      | 68 (29.1)                  |
| Black Canadian                                                  | 14 (6.2)                       | 15 (6.4)                   |
| Latin American                                                  | 22 (9.7)                       | 22 (9.4)                   |
| South Asian                                                     | 9 (4.0)                        | 7 (3.0)                    |
| East Asian                                                      | 16 (7.1)                       | 24 (10.3)                  |
| Other or not reported                                           | 51 (22.5)                      | 51 (21.8)                  |
| <b>Marital status, n (%)</b>                                    |                                |                            |
| Single                                                          | 145 (63.9)                     | 160 (68.4)                 |
| Living with a partner or married                                | 22 (9.7)                       | 23 (9.8)                   |
| Divorced, separated, or widowed                                 | 60 (26.4)                      | 51 (21.8)                  |
| <b>Smoking status, n (%)<sup>a</sup></b>                        |                                |                            |
| Never                                                           | 157 (69.2)                     | 147 (62.8)                 |
| Former                                                          | 50 (22.0)                      | 59 (25.2)                  |
| Current                                                         | 19 (8.4)                       | 27 (11.5)                  |
| <b>Age at first intercourse, years</b>                          |                                |                            |
| Mean (SD)                                                       | 17.5 (3.0)                     | 16.9 (2.2)                 |
| Median (IQR)                                                    | 17 (3)                         | 17 (2)                     |
| Range                                                           | 13-28                          | 12-23                      |
| Not reported, n                                                 | 5                              | 5                          |
| <b>Lifetime sex partners – quantiles, n (%)</b>                 |                                |                            |
| <5                                                              | 61 (26.9)                      | 60 (25.6)                  |
| 5-7                                                             | 43 (18.9)                      | 35 (15.0)                  |
| 8-11                                                            | 37 (16.3)                      | 47 (20.1)                  |
| 12-20                                                           | 47 (20.7)                      | 50 (21.4)                  |
| ≥ 21                                                            | 39 (17.2)                      | 42 (18.0)                  |
| <b>No. of sex partners in the past month, n (%)<sup>b</sup></b> |                                |                            |
| 0                                                               | 42 (18.5)                      | 36 (15.5)                  |
| 1                                                               | 144 (63.4)                     | 144 (61.8)                 |
| ≥ 2                                                             | 41 (18.1)                      | 53 (22.8)                  |
| <b>Anal intercourse in the past month, n (%)<sup>c</sup></b>    |                                |                            |
| Yes                                                             | 25 (11.0)                      | 26 (11.2)                  |
| No                                                              | 202 (89.0)                     | 206 (88.8)                 |
| <b>HPV DNA status, n (%)</b>                                    |                                |                            |

|                                                            |            |            |
|------------------------------------------------------------|------------|------------|
| Any HPV <sup>d</sup>                                       | 115 (50.7) | 141 (60.3) |
| Negative                                                   | 109 (48.0) | 93 (39.7)  |
| Missing PCR results <sup>e</sup>                           | 3 (1.32)   | 0 (0)      |
| Subgenus 1 <sup>f</sup>                                    | 38 (17.0)  | 55 (23.5)  |
| Subgenus 2 <sup>g</sup>                                    | 96 (42.9)  | 114 (48.7) |
| Subgenus 3 <sup>h</sup>                                    | 60 (26.8)  | 76 (32.5)  |
| <b>HPV vaccination status, n (%)</b>                       |            |            |
| Yes                                                        | 97 (42.7)  | 120 (51.3) |
| No                                                         | 130 (57.3) | 114 (48.7) |
| <b>Validated HPV vaccination status<sup>i</sup>, n (%)</b> |            |            |
| Yes                                                        | 47 (20.7)  | 61 (26.1)  |
| No                                                         | 64 (28.2)  | 63 (26.9)  |
| Missing                                                    | 116 (51.1) | 110 (47.0) |

Race categories with fewer than 5 participants in each group were collapsed to respect participants anonymity.

<sup>a,b,c</sup> Data were not reported by 2, 1, and 2 participants, respectively.

<sup>d</sup> Participant tested positive for at least 1 of 36 HPV types.

<sup>e</sup> Missing results correspond to invalid or mishandled samples.

<sup>f</sup> Subgenus 1 group includes HPVs 6, 11, 40, 42, 44, and 54.

<sup>g</sup> Subgenus 2 group includes HPVs 16, 18, 26, 31, 33, 34, 35, 39, 45, 51, 52, 53, 56, 58, 59, 66, 67, 68, 69, 70, 73, and 82.

<sup>h</sup> Subgenus 3 group includes HPVs 61, 62, 71, 72, 81, 83, 84, and 89.

<sup>i</sup> Details of the validation of participants' vaccination status can be found in Supplementary section 2 (Figure 2 and Tables 2A-2C).

SD: standard deviation, IQR: interquartile range, PCR: polymerase chain reaction, HPV: human papillomavirus, DNA: deoxyribonucleic acid.

**Table 2. Incidence of any HPV infection and grouped infections at the participant- and HPV-level, by study arm**

| Analysis level     | HPV infection grouping  | Carrageenan                     |                                         |                                          |                                 | Placebo                         |                                         |                                          |                                 | Effect estimate          |
|--------------------|-------------------------|---------------------------------|-----------------------------------------|------------------------------------------|---------------------------------|---------------------------------|-----------------------------------------|------------------------------------------|---------------------------------|--------------------------|
|                    |                         | N incident/<br>N at risk<br>(%) | Actuarial mean <sup>a</sup><br>(95% CI) | Arithmetic mean <sup>a</sup><br>(95% CI) | Median <sup>a</sup><br>(95% CI) | N Incident/<br>N at risk<br>(%) | Actuarial mean <sup>a</sup><br>(95% CI) | Arithmetic mean <sup>a</sup><br>(95% CI) | Median <sup>a</sup><br>(95% CI) | Hazard ratio<br>(95% CI) |
| <b>Participant</b> | Any HPV                 | 108/208<br>(51.9)               | 12.6 <sup>b</sup><br>(10.6-14.7)        | 4.8<br>(3.8-5.7)                         | 11.3<br>(6.2-14.3)              | 147/221<br>(66.5)               | 8.7 <sup>b</sup><br>(7.1-10.3)          | 3.5<br>(2.8-4.2)                         | 3.7<br>(3.0-6.0)                | 0.63<br>(0.49-0.81)      |
|                    | Subgenus 1 <sup>c</sup> | 33/208<br>(15.9)                | 24.8 <sup>b</sup><br>(22.9-26.7)        | 6.6<br>(4.8-8.3)                         | NR                              | 56/221<br>(25.3)                | 22.7 <sup>b</sup><br>(20.5-24.8)        | 5.3<br>(4.0-6.6)                         | NR<br>(17.8-) <sup>d</sup>      | 0.58<br>(0.38-0.89)      |
|                    | Subgenus 2 <sup>e</sup> | 84/208<br>(40.4)                | 16.1 <sup>b</sup><br>(13.8-18.4)        | 5.0<br>(3.8-6.1)                         | 14.9<br>(12.6-) <sup>d</sup>    | 124/221<br>(56.1)               | 11.1<br>(9.3-12.9)                      | 4.4<br>(3.6-5.3)                         | 8.6<br>(6.0-12.0)               | 0.61<br>(0.46-0.81)      |
|                    | Subgenus 3 <sup>f</sup> | 55/208<br>(26.4)                | 20.7 <sup>b</sup><br>(18.3-23.1)        | 5.7<br>(4.2-7.3)                         | 23.7<br>(20.1-) <sup>d</sup>    | 79/221<br>(35.8)                | 19.2 <sup>b</sup><br>(16.8-21.6)        | 5.5<br>(4.4-6.5)                         | 22.4<br>(13.6-) <sup>d</sup>    | 0.70<br>(0.50-0.99)      |
| <b>HPV</b>         | Any HPV <sup>g</sup>    | 278/7,217<br>(3.9)              | 29.1 <sup>b</sup><br>(28.9-29.3)        | 6.7<br>(6.0-7.3)                         | NR                              | 438/7,586<br>(5.8)              | 29.7 <sup>b</sup><br>(29.4-29.9)        | 6.4<br>(5.9-6.9)                         | NR                              | 0.65<br>(0.50-0.83)      |

<sup>a</sup> Time in months. The actuarial mean accounts for censoring, whereas the arithmetic mean excludes participants who did not acquire a new HPV type.

<sup>b</sup> Mean was underestimated since the largest observed analysis time was censored.

<sup>c</sup> Subgenus 1 includes HPVs 6, 11, 40, 42, 44, and 54.

<sup>d</sup> Upper confidence limit was undetermined since the survival function did not fall below 0.5.

<sup>e</sup> Subgenus 2 includes HPVs 16, 18, 26, 31, 33, 34, 35, 39, 45, 51, 52, 53, 56, 58, 59, 66, 67, 68, 69, 70, 73, and 82.

<sup>f</sup> Subgenus 3 includes HPVs 61, 62, 71, 72, 81, 83, 84, and 89.

<sup>g</sup> Proportional hazards Cox regression models account for all incident HPV infections acquired over follow-up. Participants were considered at risk for any HPV type absent at baseline. Each participant could contribute up to 36 observations, each corresponding to an HPV type. The unit of analysis was each individual HPV type.

CI: confidence interval, HPV: human papillomavirus, NR: not reached, N: number

**Table 3. Clearance, according to outcome and definition, of any HPV infection at the participant- and HPV-level, by study arm**

| Analysis level | Outcome                                                  | Clearance definition <sup>a</sup> | Carrageenan                    |                                            |                                             |                                 | Placebo                        |                                            |                                             |                                 | Effect estimate          |
|----------------|----------------------------------------------------------|-----------------------------------|--------------------------------|--------------------------------------------|---------------------------------------------|---------------------------------|--------------------------------|--------------------------------------------|---------------------------------------------|---------------------------------|--------------------------|
|                |                                                          |                                   | N cleared/<br>N at risk<br>(%) | Actuarial<br>mean <sup>b</sup><br>(95% CI) | Arithmetic<br>mean <sup>b</sup><br>(95% CI) | Median <sup>b</sup><br>(95% CI) | N cleared/<br>N at risk<br>(%) | Actuarial<br>mean <sup>b</sup><br>(95% CI) | Arithmetic<br>mean <sup>b</sup><br>(95% CI) | Median <sup>b</sup><br>(95% CI) | Hazard ratio<br>(95% CI) |
| Participant    | Time to clearance of all HPV types <sup>c</sup>          | Liberal                           | 62/107<br>(57.9)               | 10.0<br>(8.4-11.6)                         | 5.4<br>(4.8-5.9)                            | 9.3<br>(6.4-11.0)               | 66/133<br>(49.6)               | 13.0<br>(10.9-15.0)                        | 5.8<br>(5.2-6.4)                            | 11.1<br>(9.5-13.4)              | 1.41<br>(0.99-2.00)      |
|                |                                                          | Conservative                      | 34/107<br>(31.8)               | 14.8 <sup>d</sup><br>(13.0-16.6)           | 5.7<br>(5.0-6.5)                            | 16.0<br>(10.5-NR)               | 39/133<br>(29.3)               | 19.3<br>(16.8-21.7)                        | 6.2<br>(5.4-7.0)                            | 28.9<br>(13.6-NR)               | 1.16<br>(0.73-1.84)      |
|                | Time to first cleared HPV infection <sup>e</sup>         | Liberal                           | 85/107<br>(79.4)               | 4.7 <sup>d</sup><br>(3.6-5.8)              | 5.0<br>(4.6-5.5)                            | 3.0<br>(1.2-4.1)                | 105/133<br>(79.0)              | 4.8<br>(3.9-5.7)                           | 5.4<br>(4.9-5.8)                            | 3.2<br>(1.6-4.0)                | 1.03<br>(0.77-1.38)      |
|                |                                                          | Conservative                      | 67/107<br>(62.6)               | 6.8 <sup>d</sup><br>(5.4-8.1)              | 5.4<br>(4.9-6.0)                            | 6.0<br>(4.1-6.5)                | 81/133<br>(60.9)               | 7.6 <sup>d</sup><br>(6.1-9.2)              | 5.7<br>(5.2-6.2)                            | 5.8<br>(3.2-6.9)                | 1.04<br>(0.75-1.44)      |
| HPV            | Time to clearance of an individual HPV type <sup>f</sup> | Liberal                           | 181/271<br>(66.8)              | 0.24<br>(0.2-0.3)                          | 5.0<br>(4.2-5.7)                            | 0.20<br>(0.1-0.2)               | 243/370<br>(65.7)              | 0.29<br>(0.26-0.32)                        | 5.9<br>(5.3-6.5)                            | 0.23<br>(0.21-0.25)             | 1.17<br>(0.90-1.51)      |
|                |                                                          | Conservative                      | 122/271<br>(45.0)              | 0.38 <sup>d</sup><br>(0.3-0.4)             | 5.1<br>(4.4-5.9)                            | 0.31<br>(0.3-0.4)               | 169/370<br>(45.7)              | 0.45<br>(0.40-0.50)                        | 5.6<br>(4.8-6.3)                            | 0.34<br>(0.27-0.38)             | 1.10<br>(0.84-1.43)      |

<sup>a</sup> Liberal clearance was defined as having a single HPV-negative visit following  $\geq 1$  HPV-positive visit(s). Conservative clearance was defined as having  $\geq 2$  consecutive HPV-negative visits following  $\geq 1$  HPV-positive visit(s).

<sup>b</sup> Time in months. The actuarial mean accounts for censoring, whereas the arithmetic mean excludes participants who did not acquire a new HPV type.

<sup>c</sup> Time to clearance of all baseline HPV infections (i.e., clearance was considered to have occurred once all baseline HPV infections cleared).

<sup>d</sup> Mean was underestimated since the largest observed analysis time was censored.

<sup>e</sup> Time to clearance of the first baseline HPV infection (i.e., clearance was considered to have occurred once the first of any baseline HPV infections cleared).

<sup>f</sup> Proportional hazards Cox regression models account for all baseline HPV types that cleared over follow-up. Participants were considered at risk for clearing any HPV type present at baseline. Each participant could contribute up to 36 observations, each corresponding to an HPV type. The unit of analysis was each individual HPV type.

CI: confidence interval, HPV: human papillomavirus, NR: not reached, N: number.



**Table 4. Adverse events [n (%)] reported through different sources, overall and by study arm**

|                                                            | <b>Overall<br/>(n=461)</b> | <b>Carrageenan<br/>(n=227)</b> | <b>Placebo<br/>(n=234)</b> | <b>+ (more AE<br/>in CG arm)</b> |
|------------------------------------------------------------|----------------------------|--------------------------------|----------------------------|----------------------------------|
| <b>Any adverse event reported, overall<sup>a</sup></b>     | <b>172 (37.3)</b>          | <b>79 (34.8)</b>               | <b>93 (39.7)</b>           |                                  |
| <b>1. Daily calendar<sup>b</sup></b>                       | <b>76 (17.6)</b>           | <b>37 (17.8)</b>               | <b>39 (17.3)</b>           |                                  |
| Unusually heavy or painful period                          | 9 (2.1)                    | 1 (0.5)                        | 8 (3.6)                    |                                  |
| Vaginal bleeding in between menstrual periods              | 14 (3.2)                   | 6 (2.9)                        | 8 (3.6)                    |                                  |
| Pain during vaginal sex <sup>c</sup>                       | 19 (4.8)                   | 13 (6.9)                       | 6 (2.9)                    | +                                |
| Unusual vaginal discharge                                  | 15 (3.5)                   | 11 (5.3)                       | 4 (1.8)                    | +                                |
| Itching, burning, or pain in the genital area              | 42 (9.7)                   | 23 (11.1)                      | 19 (8.4)                   | +                                |
| Genital sore/ulcer                                         | 5 (1.2)                    | 2 (1.0)                        | 3 (1.3)                    |                                  |
| Needing to urinate more often than usual                   | 10 (2.3)                   | 3 (1.4)                        | 7 (3.1)                    |                                  |
| Pain while urinating                                       | 9 (2.1)                    | 6 (2.9)                        | 3 (1.3)                    | +                                |
| Blood in urine                                             | 4 (0.9)                    | 3 (1.4)                        | 1 (0.4)                    | +                                |
| Lower abdominal pain                                       | 8 (1.9)                    | 5 (2.4)                        | 3 (1.3)                    | +                                |
| Lower back pain not caused by physical exertion            | 2 (0.5)                    | 0 (0)                          | 2 (0.9)                    |                                  |
| Other <sup>d</sup>                                         | 42 (9.7)                   | 21 (10.1)                      | 21 (9.3)                   | +                                |
| <b>2.1 Follow-up survey<sup>e</sup></b>                    | <b>55 (13.0)</b>           | <b>24 (11.7)</b>               | <b>31 (14.2)</b>           |                                  |
| Gel use caused discomfort/adverse reactions to participant | 49 (11.6)                  | 22 (10.7)                      | 27 (12.4)                  |                                  |
| Gel use caused discomfort/adverse reactions to partner     | 10 (2.4)                   | 5 (2.4)                        | 5 (2.3)                    | +                                |
| <b>2.2 Follow-up survey, conditions<sup>f</sup></b>        | <b>91 (21.3)</b>           | <b>43 (20.7)</b>               | <b>48 (21.8)</b>           |                                  |
| Vaginal yeast infection                                    | 70 (16.5)                  | 35 (17.0)                      | 35 (16.0)                  | +                                |
| Trichomonas vaginal infection                              | 6 (1.4)                    | 3 (1.5)                        | 3 (1.4)                    | +                                |
| Venereal warts, condyloma, or HPV                          | 10 (2.3)                   | 5 (2.4)                        | 5 (2.3)                    | +                                |
| Chlamydia                                                  | 12 (2.8)                   | 6 (2.9)                        | 6 (2.7)                    | +                                |
| Genital herpes                                             | 8 (1.9)                    | 3 (1.4)                        | 5 (2.3)                    |                                  |
| Syphilis                                                   | 4 (0.9)                    | 2 (1.0)                        | 2 (0.9)                    | +                                |
| Gonorrhea                                                  | 4 (0.9)                    | 2 (1.0)                        | 2 (0.9)                    | +                                |
| Ulcers or genital sores                                    | 5 (1.2)                    | 2 (1.0)                        | 3 (1.4)                    |                                  |
| Human immunodeficiency virus                               | 4 (0.9)                    | 2 (1.0)                        | 2 (0.9)                    | +                                |
| Hepatitis B                                                | 4 (0.9)                    | 2 (1.0)                        | 2 (0.9)                    | +                                |
| Bacterial vaginosis                                        | 24 (5.6)                   | 11 (5.3)                       | 13 (5.9)                   |                                  |
| <b>3. Adverse event module (nurse report)<sup>g</sup></b>  | <b>75 (16.3)</b>           | <b>38 (16.7)</b>               | <b>37 (15.8)</b>           | +                                |
| Unusually heavy or painful period                          | 6 (1.3)                    | 1 (0.4)                        | 5 (2.1)                    |                                  |
| Vaginal bleeding in between menstrual periods              | 13 (2.8)                   | 5 (2.2)                        | 8 (3.4)                    |                                  |
| Pain during vaginal sex                                    | 18 (3.9)                   | 12 (5.3)                       | 6 (2.6)                    | +                                |
| Unusual vaginal discharge                                  | 14 (3.0)                   | 10 (4.4)                       | 4 (1.7)                    | +                                |
| Itching, burning, or pain in the genital area              | 43 (9.3)                   | 24 (10.6)                      | 19 (8.1)                   | +                                |
| Genital sore/ulcer                                         | 5 (1.1)                    | 2 (0.9)                        | 3 (1.3)                    |                                  |
| Needing to urinate more often than usual                   | 8 (1.7)                    | 3 (1.3)                        | 5 (2.1)                    |                                  |
| Pain while urinating                                       | 9 (2.0)                    | 6 (2.6)                        | 3 (1.3)                    | +                                |
| Blood in urine                                             | 4 (0.9)                    | 3 (1.3)                        | 1 (0.4)                    | +                                |
| Lower abdominal pain                                       | 6 (1.3)                    | 4 (1.8)                        | 2 (0.9)                    | +                                |
| Lower back pain not caused by physical exertion            | 2 (0.4)                    | 0 (0)                          | 2 (0.9)                    |                                  |
| Other <sup>d</sup>                                         | 25 (5.4)                   | 11 (4.9)                       | 14 (6.0)                   |                                  |
| <b>4. Adverse event follow-up<sup>g</sup></b>              | <b>20 (4.3)</b>            | <b>9 (4.0)</b>                 | <b>11 (4.7)</b>            |                                  |

The percentage of adverse events was calculated as the number of participants affected by an AE divided by the number of participants who ever responded to the question. The protocol did not specify conditions would be included as AE.

<sup>a</sup> 15 participants in the carrageenan and 5 participants in the placebo arm never provided any information about adverse events. These participants only had 1 visit. However, these 20 participants were included in the calculation of any adverse reported overall, as for two sources (Adverse event module [nurse report] and (Adverse event follow-up)), due to the nature of reporting, we used an inferred denominator that included all participants randomized.

<sup>b</sup> 28 participants were not included: 19 participants in the carrageenan arm and 9 participants in the placebo group never filled out the calendar.

<sup>c</sup> 63 participants were not included: 19 participants in the carrageenan and 16 participants in the placebo arm did not report intercourse, and 19 participants in the carrageenan arm and 9 participants in the placebo group never filled out the calendar.

<sup>d</sup> Other AEs reported included burning, irritation, urinary tract infection, spotting, and yeast infection among others.

<sup>e</sup> 37 participants were not included: 32 participants did not have a follow-up visit (19 in the carrageenan and 13 in the placebo group) and 5 participants (2 in the carrageenan arm and 3 in the placebo arm) did not respond to these questions in the follow-up survey.

<sup>f</sup> 33 participants were not included overall: 32 participants did not have a follow-up visit (19 in the carrageenan and 13 in the placebo group) and 1 participant (1 in the placebo group) did not respond to any of these questions in the follow-up survey.

<sup>g</sup> Due to the nature of reporting we used an inferred denominator, which included all participants randomized.

N: number of participants affected, +: a greater proportion of adverse events were reported in the carrageenan arm relative to the placebo arm, AE: adverse event, HPV: human papillomavirus.

**Figure 1. Trial profile: design and subject allocation**

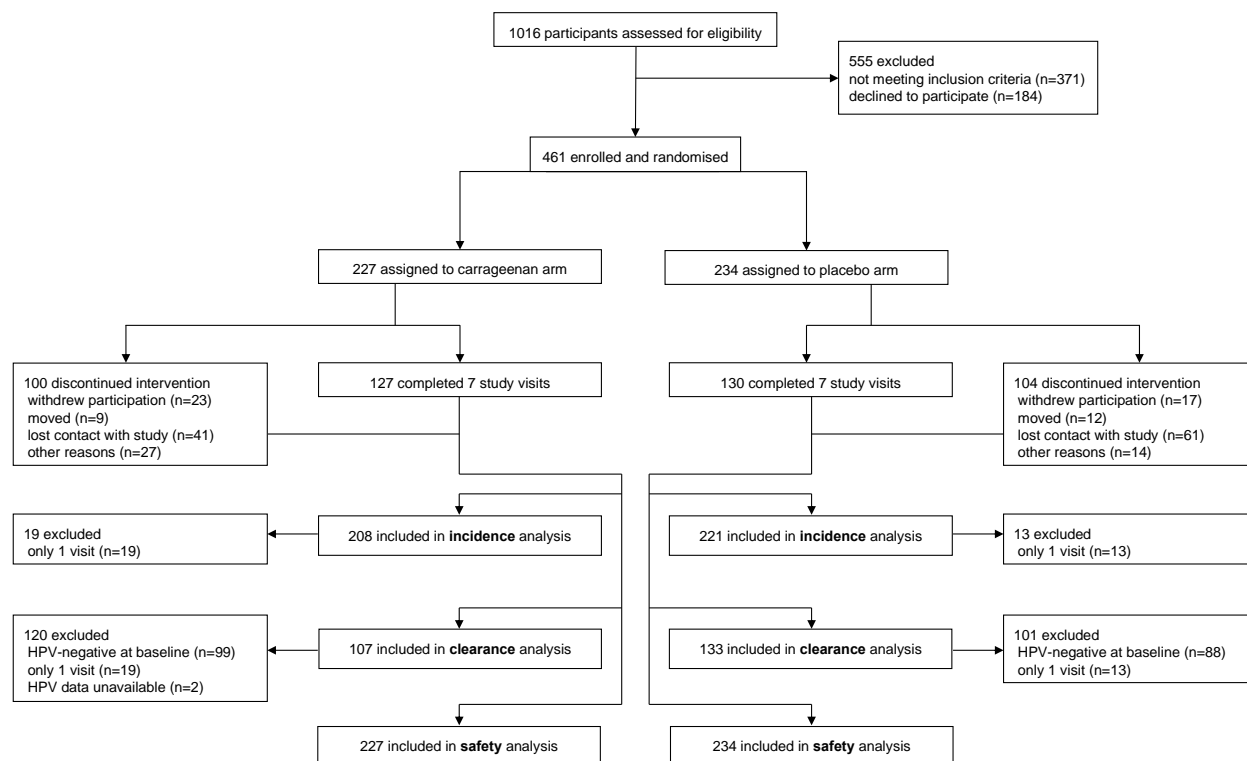

**Figure 1 legend**

The CONSORT flow diagram displays the total number of participants assessed for eligibility who were subsequently enrolled and randomised into either the carrageenan or placebo arm. Reasons for exclusion and discontinuing the intervention are provided. A total of 429 participants were included in the incidence analyses, 240 in the clearance analyses, and 461 in the safety analysis.

**Figure 2. Cumulative incidence/detection of HPV at the participant- and HPV-level**

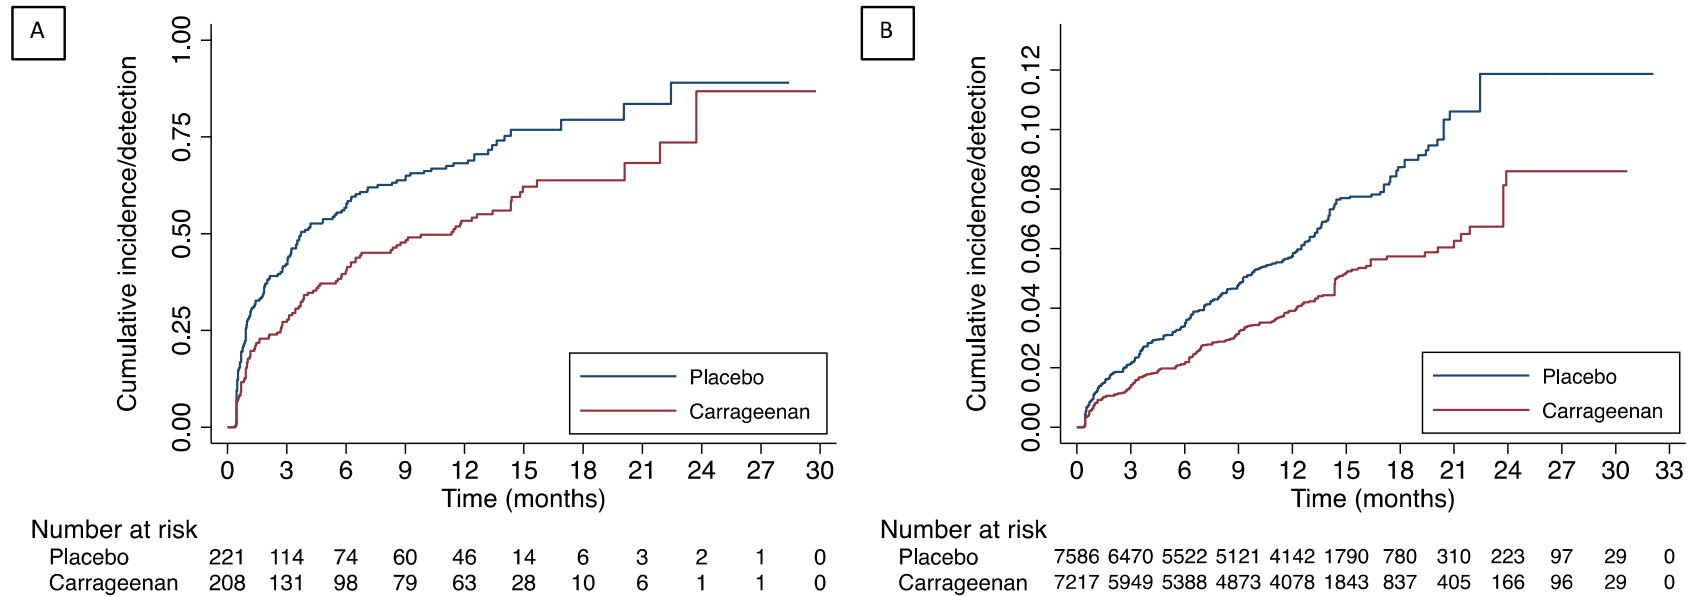

**Figure 2 legend**

Fig2A plots the first HPV infection episode detected using women as the unit of observation (i.e., participant-level analysis); the number at risk corresponds to the number of women who were HPV-negative for at least 1 of the 36 HPV types at baseline. Fig2B plots all new HPV infections based on HPV-level analysis; the number at risk corresponds to the number of infections a participant could have acquired at subsequent visits. Each participant could have acquired any of the 36 HPV types for which they were negative at baseline.
